1 **Patterns of roost site use by Asian hornbills and implications for seed dispersal**

2

3 **Authors:** Rohit Naniwadekar<sup>1,\*</sup>, Akanksha Rathore<sup>1,2</sup>, Ushma Shukla<sup>1,3</sup>, and Aparajita Datta<sup>1</sup>

4

5 <sup>1</sup> Nature Conservation Foundation, 1311, Amritha, 12<sup>th</sup> Main, Vijayanagar 1<sup>st</sup> Stage, Mysuru,  
6 Karnataka, India 570017.

7 <sup>2</sup> Centre for Ecological Sciences, Indian Institute of Science, Bengaluru, India 560012.

8 <sup>3</sup> INRAE Val de Loire, Research unit-Forest Ecosystems, Domaine des Barres, Nogent-sur-  
9 Vernisson, 45290 France.

10

11 \* Corresponding Author; email: [rohit@ncf-india.org](mailto:rohit@ncf-india.org); phone: +91-821-2515601.

12

13 **Abstract**

14 Animals spend a significant amount of time roosting. Therefore, understanding roosting  
15 patterns and the processes that influence roosting behaviour and roost site choice is essential.  
16 Hornbills exhibit interesting roosting patterns with some species roosting communally in  
17 large flocks. They are important seed dispersers and patterns of roost site use can have a  
18 significant influence on seed dispersal distributions and thereby on plant recruitment. We  
19 documented roost site use by four Great Hornbills (*Buceros bicornis*) and one Wreathed  
20 Hornbill (*Rhyticeros undulatus*) at a site in north-east India using GPS telemetry. We  
21 examined the influence of riverine habitats, nests and foraging range on roost selection. We  
22 determined the proportion of seeds that hornbills disperse at roosts and the dispersal distances  
23 of seeds dispersed at roosts from the source trees. Through telemetry, we found that roosts of  
24 Great Hornbills were generally in forested habitats. Our telemetry data showed that Wreathed  
25 Hornbill roosts were close to the river. These results were corroborated by observational data  
26 from roost sites where we had regular detections of relatively large flocks of Wreathed  
27 Hornbills and occasionally Great Hornbills. The roost sites were not close to the nest sites  
28 and were generally within the 95% kernel density diurnal activity ranges. Hornbills dispersed  
29 a small proportion of seeds at roost sites. Seeds dispersed at roost sites had almost twice the  
30 dispersal distances compared to those dispersed at non-roost sites. This study highlights  
31 variation in roost site pattern across individual hornbills and its implications for seed  
32 dispersal.

33

34 **Keywords:** communal roosting, Great Hornbill, GPS telemetry, north-east India, seed  
35 dispersal, Wreathed Hornbill

36 **Introduction**

37 Animals spend a significant part of their life at roosts which are critical habitat for them.  
38 Therefore, understanding the patterns of roost site use is essential. The choice of roost sites  
39 may be influenced by access to food resources (Johnston-González and Abril 2019)  
40 preference for specific habitats (Zoghby et al. 2016), protection from extreme weather (Peters  
41 and Otis 2007), predation pressure (Bock et al. 2013, Johnston-González and Abril 2019),  
42 parasite avoidance (Rohner et al. 2000), mate selection and anthropogenic disturbance (Peters  
43 and Otis 2007). The factors that influence roosting patterns may differ across sympatric  
44 species (Peters and Otis 2007). Certain species roost communally, which may accord  
45 foraging benefits through information transfer (Ward and Zahavi 1973) apart from enabling  
46 energy efficiency (Williams and Du Plessis 2013) and reduced per-capita predation pressure  
47 (Eiserer 1984). Most information on roosting comes from raptors (Bock et al. 2013, Watts  
48 and Turrin 2017), water birds (Peters and Otis 2007, Jankowiak et al. 2015,  
49 Johnston-González and Abril 2019) and birds in temperate regions (Zabala et al. 2012,  
50 Jamieson et al. 2016) with relatively little information from tropical birds (Jirinec et al.  
51 2018).

52         Hornbills are among the largest avian frugivores in Asian and African tropics.  
53 Hornbill species may roost as singles (usually breeding males), in pairs, family groups,  
54 smaller flocks or in large communal roosts (>50 to over 2000 birds) (Poonswad et al. 2013).  
55 At least 26 of the 62 extant hornbill species are known to roost in small flocks or large  
56 communal roosts (Kemp 1995, Datta 2001). Multiple Asian hornbill species roost  
57 communally (Kemp 1995). The most spectacular communal roosts are those of the Plain-  
58 pouched Hornbills (*Rhyticeros subruficollis*) with around 3000 being reported from Malaysia  
59 at a single site (Ho and Supari 2000, Kaur et al. 2011). In general, hornbill species of the  
60 *Rhyticeros* genus roost in larger flocks (> 50 birds), with 500-1000 Wreathed Hornbills

61 (*Rhyticeros undulatus*) seen at some roost sites in Thailand (Thailand Hornbill Project 2019).  
62 A study in north-east India highlighted that hornbills roost on isolated trees in open riverine  
63 grassland areas or on cliff faces with lower tree density adjacent to rivers or perennial streams  
64 rather than their diurnal forested habitats (Datta 2001). The number of birds in these riverside  
65 roosts changed between breeding and non-breeding seasons with smaller numbers in the  
66 breeding season as compared to the non-breeding season (Datta 2001). Apart from  
67 observations and counts of hornbills at roost sites, there is limited understanding of how  
68 individual hornbills make roost site choices. Hornbills may have a selection of roost sites that  
69 may be visited at irregular intervals throughout the year (Kemp 1995). A telemetry study on  
70 four groups of Southern Ground Hornbills (*Bucorvus leadbeateri*) revealed that birds  
71 preferred riverine habitat for roosting, they spent between 1-4 nights per roost per season, and  
72 the number of roosts changed seasonally and across the different groups (Zoghby et al. 2016).  
73 Similar information does not exist for most other African hornbills. Most of the information  
74 on roosting by some Asian hornbill species is from counts of hornbills at roosts.

75         The detectability and accessibility of roost sites often determine the choice of sites for  
76 roost monitoring. Often these roost sites are along the river or in open areas that are more  
77 accessible and easily detected, precluding knowledge on roosting at sites that may be in more  
78 forested areas. Monitoring roost sites only in the open areas prevents determining whether  
79 hornbills prefer to roost in particular habitats (e.g. along the rivers) or close to their nests or  
80 foraging areas deeper inside the forest. Telemetry data can provide accurate information on  
81 roost site use by individual birds over time. It can be determined if roost site use is influenced  
82 by certain habitat features (that may provide them safety from predators) or their nests or  
83 their foraging areas by examining frequency and proximity of roost locations to specific sites.  
84 Given that hornbills have unique breeding biology with the female incarcerated inside the  
85 nest cavity for several months, and the male singly providing food to the female and the

86 chick/s, nest location can also be expected to influence roosting patterns of birds in the  
87 breeding season. They may prefer roosting near their nests. On the other hand, given that the  
88 hornbill diet is mainly fruits, which are often patchily distributed, hornbills might prefer to  
89 roost in or near their foraging areas. Information such as this is currently lacking. GPS  
90 telemetry allows us to investigate these questions in greater detail.

91       Patterns of roost site use may have a significant implication for the critical ecological  
92 role that the hornbills play in tropical forests. Forest dwelling hornbill species are called  
93 ‘farmers of the forest’ as they are primarily frugivorous and play an effective quantitative and  
94 qualitative role in seed dispersal (Lenz et al. 2011, Kitamura 2011, Naniwadekar et al. 2019a,  
95 b). They are known to remove a significantly larger number of large-seeded fruits as  
96 compared to other avian frugivores (Naniwadekar et al. 2019a), and play a key role in long-  
97 distance seed dispersal (Holbrook and Smith 2000, Lenz et al. 2011, Naniwadekar et al.  
98 2019b). While hornbills scatter disperse large quantities of seeds in the forest (Naniwadekar  
99 2014), they are also known to clump-disperse seeds at their nests and roost sites (Kinnaird  
100 1998, Datta 2001, Kitamura et al. 2008). At nest sites, while clumped-dispersal of seeds may  
101 offer an initial advantage to hornbill-diet species (Kinnaird 1998), density-dependent  
102 mortality of seeds and seedlings in the long run results in negating any potential advantages  
103 conferred by clump-dispersal of seeds at nest sites (Datta 2001). Similarly, at the roost site,  
104 dispersed seed densities can be an order higher than in perch sites (and almost half that at the  
105 nest sites) resulting in clumped seed dispersal (Datta 2001, Kitamura et al. 2008). At the roost  
106 sites, although seedlings of hornbill food tree species do establish initially, very few survive  
107 beyond a year (Datta 2001, Kitamura et al. 2008). Apart from density-dependent factors,  
108 many roost sites are in open riverine areas with significantly lower tree density and canopy  
109 (Datta 2001) and are not favourable for the recruitment of hornbill-diet species. Certain roost  
110 sites on cliff faces or steep slopes are also not favourable for seedling recruitment, as the

111 seeds roll off and gather in a pile below. Given that hornbills scatter-disperse seeds in the  
112 daytime (Naniwadekar 2014, Naniwadekar et al. 2019b) and clump-disperse seeds at roosts,  
113 it will be useful to estimate what proportions of seeds are dispersed at roost sites vis-à-vis  
114 non-roost sites. Breeding male hornbills disperse a very small proportion of seeds at nest sites  
115 and contribute to scatter-dispersal of seeds unlike the incarcerated females (Naniwadekar et  
116 al. 2019b). Similarly, if only a small proportion of overall seeds dispersed by hornbills are  
117 clump-dispersed at roost sites, then it may not negatively impact the dispersal of tree species,  
118 if some of the seeds are clump-dispersed by a frugivore, which is otherwise scatter-dispersing  
119 seeds at large distances from the parent plant, thereby enabling expansion of geographic  
120 ranges of plants and maintaining genetic connectivity between different plant populations.

121         Given this background, the broad objectives of our study were to understand the  
122 patterns of roost site use by two species of hornbills (Great Hornbill (*Buceros bicornis*) and  
123 Wreathed Hornbill) and its implication for seed dispersal. We first describe the number of  
124 roosts used by individual hornbills, the frequency of use of different roosts, and the distance  
125 between roost sites on successive nights. We then examine whether the riverine habitats  
126 (since hornbills are observed roosting on trees in riparian habitats) and nest influence the  
127 roost site use. We also examine the distribution of roost sites used in relation to the diurnal  
128 foraging range of the individual hornbills. Lastly, we determine the relative proportion of  
129 seeds that are dispersed by hornbills at roost and non-roost sites and the dispersal distances of  
130 seeds dispersed at roost and non-roost sites. Seed dispersal distances help assess the role of  
131 hornbills as long-range seed dispersers and how movements made for roosting influences this  
132 parameter.

133

## 134 **Materials and methods**

135 *Study area*

136 We carried out the study in Pakke Tiger Reserve (area: 861.9 km<sup>2</sup>; 92°36'–93°09'E and  
137 26°54'–27°16'N), which is part of the Eastern Himalaya Biodiversity Hotspot, in Arunachal  
138 Pradesh state, in north-east India. We tagged the hornbills over two years in the south-eastern  
139 part of the reserve, an area dominated by tropical semi-evergreen forest (Champion and Seth  
140 1968, Naniwadekar et al. 2019b). To the south of Pakke is the Nameri Tiger Reserve in  
141 neighbouring Assam state and the Papum and Doimara Reserved Forests are to the east and  
142 west of the Pakke Tiger Reserve respectively. The Reserved Forests experience significant  
143 biotic pressures. Great (*Buceros bicornis*) (2.2–4 kg), Wreathed (*Rhyticeros undulatus*) (1.4–  
144 3.7 kg), Oriental Pied Hornbill (*Anthracoceros albirostris*) (0.6–0.9 kg) and the Rufous-  
145 necked (*Aceros nipalensis*) (2.2–2.5 kg) are found in Pakke. The latter is restricted to the  
146 higher elevations. IUCN has classified the Great, Wreathed and the Rufous-necked hornbill  
147 as 'Vulnerable' and the Oriental Pied hornbill as 'Least Concern' (IUCN 2019). We tagged  
148 five adult, male Great Hornbills and one adult, male Wreathed Hornbill between October  
149 2014 and May 2016. E-obs tags (Model 'Bird 1A'; e-obs GmbH; Germany) were used to  
150 obtain fine-scale movement information on hornbills. The breeding season of hornbills is  
151 between March to August. One non-breeding Great Hornbill was tagged in the breeding  
152 season (March 2016), and one Great hornbill was tagged in the non-breeding season  
153 (November 2015). We only tagged adult males. Since hornbills are diurnal animals, tags were  
154 programmed to take locations at 15-minute intervals throughout the day and turn off at night  
155 to save tag battery power. Reliable roosting information was not available for one of the  
156 Great Hornbills, whose tag was programmed to shut down at sunset and turn on at sunrise.  
157 For all the other birds the tag was programmed to shut down at least 45 min after sunset (~  
158 19:00 hr IST) and turn on at least two hours before sunrise (~ 03:10 hr IST), which allowed  
159 us to extract information on hornbill roosting reliably. Based on our field observations,  
160 hornbills arrive at roosts latest by 17:00–18:00 hr (IST) in June when the days are longest.

161 Additional details on the methods and the study area can be found in (Naniwadekar et al.  
162 2019a, b). The GPS data for this study can be accessed from Naniwadekar et al. (2019c).

163 We monitored one roost site for 45 days between April to June (breeding season) in  
164 2015 and two roost sites (including the one monitored in 2015) for a total of 211 roost watch  
165 days (190 unique days on 21 days both roosts were observed) across breeding and non-  
166 breeding season in 2016. One of the monitored roosts was next to the Pakke river. The other  
167 roost was on a hill slope in Darlong village, which is on the banks of Pakke River. While the  
168 first roost site was 20 m from the riverbank, the other was 370 m from the riverbank. Both the  
169 roost sites were located outside the boundary of Pakke Tiger Reserve in the adjoining Papum  
170 RF and were close to human habitation. Two-three observers counted hornbills at roost sites  
171 between 16:00 to 18:00 hr (IST). We recorded the species, time of arrival and number of  
172 individuals.

### 173 *Analysis*

174 To determine roosts of hornbills, we calculated mean displacement distances between  
175 consecutive time points (for every 15-min interval) between 03:15–19:00 hr and found that  
176 displacement distances were least for 19:00 hr for the five hornbills (< 32 m; range across  
177 individuals: 17.9–31.2 m). Therefore, we used the location of hornbills at 19:00 hr as the  
178 roost location for the day. Due to GPS tag errors, location data was not available for 19:00 hr  
179 (and often for few periods before that) for all days for all birds. Mean displacement distances  
180 were higher for time intervals before 18:30 hr. Days for which we had obtained data at 18:30  
181 hr, we had received data at 19:00 hr also. Therefore, we used the data only for the days on  
182 which we had location information at 19:00 hr. We used the roost data to calculate the mean  
183 displacement distances between roosts on consecutive days to determine how far, on average,  
184 were the roosts located on successive days for the different hornbill individuals.



185 We used hierarchical cluster analysis with complete-linkage method implemented  
186 through the ‘stats’ package in R to identify the cluster of points that were within 200 m from  
187 each other (R Core Team 2019). Our observations at communal roosts of hornbill indicate  
188 that often hornbills roost on multiple trees at a single site and the distance between the trees  
189 can be around 100 m from each other. After arriving at the roost sites, they also move  
190 between individual trees. While individual roost locations may vary, we considered all roost  
191 locations within 200 m of each other as a single ‘roost site’, and the centroid of the locations  
192 within 200 m of each other was assigned a unique roost site code. We assigned any roost  
193 which was > 200 m from each other as a separate roost site. We then determined the number  
194 of unique roosting sites used by individual birds and the mean and the maximum number of  
195 nights for which the particular bird used the same roost site.

196 To determine if the nest of the tagged, breeding birds or presence of perennial  
197 rivers/streams influenced the choice of the roost site, we determined the distance of the roost  
198 site from its nest (in the case of the two breeding Great and one breeding Wreathed Hornbill)  
199 and from the river/perennial stream for all the five individuals. While Naniwadekar et al.  
200 (2019b) have reported the hornbill home ranges, we wanted to determine if the roost  
201 locations were within or outside the diurnal activity ranges of the individual birds. We  
202 determined the diurnal activity ranges of individual birds by using the kernel density  
203 estimation method using the library “adehabitatHR” in R (Calenge 2006) to generate the  
204 utilization distributions of the individual birds. We used the default “href” function as the  
205 smoothing parameter (Worton 1995, Watts and Turrin 2017). Utilization distribution is a  
206 representation of the relative space use by an individual bird within its entire activity range  
207 (Worton 1989). To determine the diurnal activity range of the different hornbill individuals,  
208 we used the locations between 05:00 and 17:00 hr for the breeding birds (GH3Br, GH4Br and  
209 WH1Br) and the non-breeding individual (GH5NBr) that was tagged in the breeding season

210 (Naniwadekar et al. 2019b). For the non-breeding Great Hornbill tagged in the non-breeding  
211 winter season (GH2NBr), we used the locations between 06:00 and 16:00 hr since the sunrise  
212 and sunset is later and earlier in winters respectively. Hornbills start arriving at the roost sites  
213 up to half an hour before sunset (Datta 2001) and our long-term observations of hornbills at  
214 select communal roosts indicate that the birds mostly leave the roost before sunrise. We  
215 independently validated these timings with the mean displacement in every 15-min intervals  
216 for our tagged birds to confirm that our selected timings coincided with the diurnal activity of  
217 the different hornbills. We plotted the roost locations as identified using the hierarchical  
218 cluster analysis on these diurnal activity ranges of the hornbills to determine if the roost  
219 locations were within the diurnal activity range or outside it.

220 We followed the method outlined in Naniwadekar et al. (2019b) to estimate the  
221 relative proportion of seeds that were deposited at roost and non-roost (other) sites and  
222 determine the dispersal distances of seeds that were deposited at roost and non-roost sites. In  
223 Naniwadekar et al. (2019b), we have outlined the method that we followed to estimate the  
224 relative proportion of seeds that were dispersed at the nest and non-nest sites. A random  
225 starting point was selected following the distribution of foraging sightings across the entire  
226 day. We excluded roost and nest locations of birds from this starting point selection since  
227 they were unlikely to be fruiting trees. We integrated the movement information with the gut  
228 passage time data to determine the end location where the hornbill potentially dispersed the  
229 seed. If the end location was within 50 m of the roost location for that particular day from  
230 which the starting point was selected, then the seed was classified as dispersed at the roost  
231 site. In this case, the roost location was the precise, daily roost location and not the ‘roost  
232 site’ (which was centroid of all roost locations within 200 m from each other) that was  
233 identified using the hierarchical cluster analysis. We used the 50 m buffer around the roost to  
234 account for both the GPS error and the typical canopy extent of the large trees which

235 hornbills often use for roosting. We also determined the dispersal distances of the seeds from  
236 their random start location. Additional information on the distribution of foraging sightings  
237 over time, gut retention times and the analytical framework can be found in Shukla et al. ( in  
238 press) and Naniwadekar et al. (2019b). We performed all the analysis in R ver. 3.5.3 (R Core  
239 Team 2019).

240

## 241 **Results**

242 We had a total of 214 days of roosting data for the five hornbills (Table 1). The number of  
243 days of data available for a single individual varied between 19–72 days (Table 1). The roost  
244 locations for the different hornbill individuals are shown in Figure S1. Most of the roost sites  
245 were inside the Pakke and the adjacent Nameri Tiger Reserves. A few roost sites of GH2NBr  
246 were in the undisturbed forested tracts of Papum Reserved Forest outside the Pakke Tiger  
247 Reserve, and one roost site (eastern most site) of the Wreathed Hornbill was outside Pakke  
248 Tiger Reserve across the Pakke River close to human settlements in the neighbouring state of  
249 Assam (Fig. S1). The mean distance between roosts on successive nights for the different  
250 Great Hornbills varied between 130–1051 m (Table 2). For the Wreathed Hornbill, the mean  
251 distance between roosts on successive nights was 1305 m (Table 2). There was no consistent  
252 difference between breeding and non-breeding Great Hornbills (Table 2). However, the  
253 maximum distance between roosts on successive nights was greater than 1.18 km for the two  
254 non-breeding Great Hornbills but was less than 710 m for the two breeding Great Hornbills  
255 (Table 2).

256 Hierarchical cluster analysis revealed that the number of roost sites used varied across  
257 different individuals for the cluster distance of 200 m (since we classified all points within  
258 200 m from each other as a single roost site; see Methods). For the breeding Great Hornbills  
259 (GH3Br and GH4Br), the number of roosts used during the entire tracking period varied

260 between 3–8 respectively (Table 1). There was only 19 days of data available for GH4Br.  
261 The maximum number of days for which an individual bird used a roost site over the entire  
262 tracking period was 17 days for both GH3Br and GH4Br (Fig. S1A and B). For the non-  
263 breeding Great Hornbills, the number of roost sites used during the entire tracking period  
264 varied between 11–33 for GH3NBr and GH5NBr (for which data was available for 30–55  
265 days) (Table 1). The maximum number of days for which an individual bird used the same  
266 roost site during the entire tracking period was 8 and 11 days for GH2NBr and GH5NBr,  
267 respectively (Fig. S1C and D). For the breeding Wreathed Hornbill, we identified ten roost  
268 sites during the entire tracking period from 72 days of available data (Table 1). Wreathed  
269 Hornbill used two of the ten roost sites for up to 18 days each (Fig. S1E). Both these roost  
270 sites were close to the river (Fig. S1E). The mean number of successive nights the five birds  
271 used the same roost site (indicating repeated use of the same roost) varied between 2.6–5.3  
272 days (Table 2).

273 Roosts of Great Hornbills were generally away from the river bank, but those of  
274 Wreathed Hornbill were close to the river. The mean ( $\pm$  SE) distance of the roost sites from  
275 the river was not very close for the 1850.2 ( $\pm$  326.2) m for GH2NBr, 3054.4 ( $\pm$  80.3) m for  
276 GH3Br, 941.5 ( $\pm$  219.4) m for GH4Br, 1536.5 ( $\pm$  176.4) m for GH5NBr and only 157.6 ( $\pm$   
277 65.2) m for WH1Br (Fig. 1). The hornbills did not roost near the nests. The mean ( $\pm$  SE)  
278 distance of the roost sites from the nest site was 423.9 ( $\pm$  86.8) m for GH3Br, 964.6 ( $\pm$  231.4)  
279 m for GH4Br and 1754.2 ( $\pm$  473.5) m for WH1Br (Fig. 2). All the roost sites of the breeding  
280 Great Hornbills (GH3Br and GH4Br) (except one for GH3Br) were outside the 50% kernel  
281 density utilization distribution (Fig. 2). However, eight of the 11 roost locations of GH2NBr  
282 and 16 of the 33 roost locations of the GH5NBr were within the 50% kernel density  
283 utilization distribution (Fig. 2). For the Wreathed Hornbill, six of the 10 locations were  
284 outside the 50% kernel density utilization distribution (Fig. 2). All hornbills appear to exhibit

285 relatively long bout of flying when they leave their roosts in the morning and when they  
286 arrive at their roosts in the evening as was evident by examining the mean displacement at  
287 every 15-min interval (Fig. 3).

288         Roost monitoring data indicated that Great Hornbills occasionally (62 out of 256 days  
289 of monitoring) used the two riverside roost sites. Great Hornbills were seen on 58 out 157  
290 days of monitoring in the breeding season and four out of 99 days of monitoring in the non-  
291 breeding season showing seasonal differences in roost use. The median (range) of Great  
292 hornbills when they used the roost site was two (1-5) showing they did not roost in large  
293 flocks (Fig. 4). On the other hand, Wreathed Hornbills almost always used the two riverside  
294 roost sites (241 out of 256 days of monitoring across the two years). They were seen in 151  
295 of the 157 days of monitoring in the breeding season, and 90 of the 99 days of monitoring in  
296 the non-breeding season. Whenever Wreathed Hornbills arrived at the roost sites, they were  
297 in relatively larger numbers as compared to the Great Hornbill. The median number of birds  
298 was lower in the Darlong roost site (breeding season: median (range) = 10 (1-25); non-  
299 breeding season: median (range) = 7.5 (1-17)) as compared to the River Bank roost site  
300 (breeding season: median (range) = 25 (1-78); non-breeding season: median (range) = 21 (1-  
301 45)) (Fig. 4).

302         The relative percentage of seeds dispersed at the roost sites varied between 7 – 17%  
303 (Fig. 5). The breeding hornbills (GH3Br: 7%; GH4Br: 7%) dispersed fewer percentage of  
304 seeds under the roost trees as compared to the non-breeding hornbills (GH2NBr: 17%;  
305 GH5NBr: 10%) (breeding vs. non-breeding hornbills:  $\chi^2_{1}=146.6$ ,  $P < 0.001$ ) (Fig. 4). The  
306 estimated percentage of seeds dispersed under the roost trees for the breeding Wreathed  
307 Hornbill was 9% (Fig. 5). The mean dispersal distances of seeds is higher when they are  
308 dispersed at roost sites as compared to non-roost sites (Fig. 5).

309

310 **Discussion**

311 This is the first study to examine the individual patterns of roost use by Asian Hornbills and  
312 the influence of specific habitat, nest and diurnal foraging range on roost site selection. While  
313 Wreathed Hornbills tend to roost near rivers, individual Great Hornbills mostly roost in  
314 forested sites away from the river. Both Great and Wreathed Hornbills show some roost site  
315 fidelity with individuals using some roosts more often than others. This study highlights that  
316 despite exhibiting relatively long commutes to the roost, almost all the roost locations of  
317 different hornbill individuals were within the diurnal activity ranges of the hornbills. This  
318 study also highlights that hornbills dispersed relatively small proportion of seeds at roost  
319 sites. Hornbills dispersed the bulk of the seeds at non-roost sites, which are likely to be more  
320 suitable for germination of seeds. Given that individual hornbills use multiple roosts, not all  
321 roosts are likely to be used frequently. The infrequently used roost sites might offer  
322 favourable opportunities for seeds to establish. Interestingly, the seed dispersal distances at  
323 roost sites were more than twice compared to sites where hornbills perch but are not roost  
324 sites, facilitating very long-range seed dispersal events during roosting by hornbills. The roost  
325 site monitoring data corroborates the finding from the telemetry study demonstrating that  
326 Wreathed Hornbills prefer to roost close to the river often in relatively larger numbers as  
327 compared to the Great Hornbill.

328 *Roosting patterns of hornbills*

329 Despite anecdotal reports of several hornbill species that roost communally and in large  
330 flocks, there have been relatively very few published studies on the roosting ecology of  
331 hornbills (Zoghby et al. 2016). Datta (2001) observed several roosts of hornbills at our study  
332 site and reported that Wreathed Hornbills often roosted communally close to rivers or  
333 perennial streams and documented seasonal differences in the numbers of hornbills using the  
334 roost. Wreathed Hornbills were occasionally accompanied by the Great and by the Oriental

335 Pied Hornbills, mainly in the non-breeding season (Datta 2001). While the Great Hornbills  
336 may roost along the river as is evident for the two non-breeding hornbills, our telemetry data  
337 for the two breeding Great hornbills demonstrated that they mostly roost away from the  
338 rivers/perennial streams in the forests. This is corroborated by the roost monitoring data since  
339 we only occasionally saw the Great Hornbills using the roost site which were used regularly  
340 by Wreathed Hornbills in relatively large numbers. Whenever they did use the roost site, they  
341 did it in small numbers. The two breeding Great Hornbills in our study did not roost near  
342 rivers or perennial streams. Great Hornbills range over a very small area in the breeding  
343 season ( $< 2 \text{ km}^2$ ) (Naniwadekar et al. 2019b) and the ranges of the two breeding Great  
344 Hornbills did not have the river or perennial streams close by which likely explains this  
345 pattern of the breeding Great Hornbills not roosting near the river.

346 Southern Ground Hornbills are known to use multiple roosts and exhibit roost site  
347 loyalty (Zoghby et al. 2016). Like the African Hornbills, the two large-bodied Asian Hornbill  
348 species use multiple roosts and appear to use at least some of the roosts on multiple  
349 occasions. Our limited data indicated that the breeding Great Hornbills seem to have fewer  
350 roosts as compared to non-breeding birds. This is expected since the non-breeding areas  
351 encompass very large areas (Naniwadekar et al. 2019b) resulting in hornbills roosting in  
352 different locations. One of the non-breeding Great hornbills used 33 unique roost sites (sites  
353 that were separated by at least 200 m from each other) in 55 days. Despite ranging over large  
354 areas, even non-breeding birds appear to repeatedly use some of the roost sites indicating  
355 some roost site preference in the non-breeding season.

356 The role of nests in influencing roosting locations is relatively poorly understood.  
357 Given that hornbills exhibit high parental investment in breeding, one can expect nests to  
358 influence the roosting of breeding hornbills. However, our data suggests otherwise. In the  
359 case of hornbills, GH3Br likely used its nest tree as a roost for a single night only. All the

360 other nights and the other breeding Great Hornbills and Wreathed Hornbill did not roost near  
361 their nests. Similar results have been found for juncos (*Junco hyemalis*), where they were  
362 found not to roost near their nests (Chandler et al. 1995).

363 Often the choice of the roosts by birds is positively influenced by the position of the  
364 foraging sites (Watts and Turrin 2017, Johnston-González and Abril 2019). The choice of  
365 roost sites may also be influenced by factors like thermoregulation (Williams and Du Plessis  
366 2013) and predation pressures (Townsend et al. 2009, Johnston-González and Abril 2019). In  
367 some cases, the roost locations may be entirely outside their diurnal activity ranges (Jirinec et  
368 al. 2016) or in a completely different habitat (Townsend et al. 2009). If the preferred roost  
369 sites are not available within the diurnal activity range, it may entail commutes to and from  
370 the roost sites to the diurnal activity range. In the case of the hornbills, the roost locations  
371 were not located necessarily in the core of their habitats but were within the 95% utilization  
372 distribution values. Hornbills also commuted from and to the roost. The Wreathed Hornbill  
373 preferred to roost close to the river as is evident from the distance of the roost sites from the  
374 Pakke River. However, given that most roost sites of the Wreathed Hornbills were located  
375 close to the river likely explains the movement to and away from the roosts. The riparian  
376 habitats, where the Wreathed Hornbills roost, have a distinct assemblage of tree species,  
377 many of which are not hornbill food plants (Datta 2001). The mean displacement exhibited  
378 by Wreathed Hornbill was more than twice that of the Great Hornbills in the mornings when  
379 they left the roost and in the evenings when they returned to the roosts indicating long  
380 commutes by the Wreathed Hornbills. However, even during the day, the Wreathed Hornbill  
381 ranged over areas larger than the Great Hornbills. Therefore, despite long commutes, the  
382 roosts of the Wreathed Hornbills were within the 95% utilization distributions. *Rhyticeros*  
383 Hornbills are known to commute relatively long distances to and away from their roosts.  
384 Large flocks of the Plain-pouched Hornbills *Rhyticeros subruficollis* are known to fly to and



385 away from the roosts in peninsular Malaysia (Ho and Supari 2000, Kaur et al. 2011). Given  
386 that even the Great Hornbill travelled some distances and yet the roosts were within the 95%  
387 utilization distributions, suggests that local-scale factors, possibly related to nocturnal  
388 predation pressures among others, and evolutionary-scale factors, that potentially influence  
389 its roost selection which needs to be examined in future.

390         Roost site monitoring data corroborates some of the findings of the telemetry data.  
391 Wreathed Hornbills regularly roost in relatively large numbers (as compared to the Great  
392 Hornbill) on the riverbank site (on *Albizia procera* and *Bombax ceiba* trees) and the village  
393 site which is less than 400 m from the riverbank (Fig. S3). While communal roosting would  
394 facilitate information exchange, pair formation and accord protection due to dilution effect  
395 and greater vigilance, roosting in open, riverine habitats may also accord additional  
396 advantage by enabling relatively easier detection of potential arboreal mammalian predators.  
397 Additionally, the nocturnal, arboreal predators of hornbills, like clouded leopards and  
398 binturongs, are less likely to use open habitats along the river (Grassman et al. 2005, Tan et  
399 al. 2017). Great Hornbills, on the other hand, were hardly seen in the riverine or the village  
400 site. The abundances of Great and Wreathed Hornbills in the site are similar (Dasgupta and  
401 Hilaluddin 2012). Thus, the observed differences in the number of birds also indicates lower  
402 preference by the Great Hornbill for riverine sites as is demonstrated by the telemetry data.  
403 Datta (2001) reported Great Hornbills communally roosting along the river banks, which we  
404 also detected occasionally. It remains to be determined whether increasing disturbance in the  
405 riverine areas has negatively affected this pattern.

406         Hornbills have been reported to roost close to human settlements (Datta 2001). In the  
407 late nineties and by 2004, many roost trees in the riverine habitat close to the settlements on  
408 the Assam-Arunachal Pradesh border were felled. A single tall *Bombax ceiba* tree that was  
409 still standing and being used as a roost site by Wreathed Hornbills, including our tagged

410 Wreathed Hornbill, was felled in 2017. This happened despite local people knowing about  
411 the use of this tree as a roost for many years. This highlights the vulnerability of the  
412 traditional, communal roost sites, which are often in open areas and close to human  
413 habitations, to human perturbations. We observed hornbills starting to roost in the Darlong  
414 village outside the Pakke Tiger Reserve towards the end of 2015. It is rare to see hornbills  
415 roosting in a village in Arunachal Pradesh, where hornbills are hunted (Naniwadekar et al.  
416 2015). However, in the study area, hunting of hornbills has declined over the years. Roosting  
417 of hornbills in Darlong village is an example of how large-bodied hornbills may use human-  
418 dominated areas in the absence of direct persecution.

419 *Seed dispersal at roosts*

420 Hornbills and other frugivorous animals, like primates, have been reported to clump-disperse  
421 seeds at the roost sites (Datta 2001, Russo and Augspurger 2004, Kitamura et al. 2008). Often  
422 the initial advantage of clump-dispersal of seeds in the form of high seed and seedling  
423 densities is negated because of density-dependent mortality factors in the later stages (Datta  
424 2001, Russo and Augspurger 2004, Kitamura et al. 2008). This study demonstrates the  
425 variable context of seed dispersal by hornbills at roost sites. This study highlights that  
426 hornbills dispersed only a small proportion of seeds at the roost sites. Given that hornbills  
427 spend a significant proportion of time foraging away from the roost sites in the daytime, the  
428 bulk of the seeds are dispersed away from the nest sites during the daytime (Kitamura et al.  
429 2008). During the daytime, hornbills have been demonstrated to scatter-disperse seeds in  
430 large quantities, especially in sites where they occur in large densities (Naniwadekar 2014).  
431 Previous studies on clumped-dispersal by hornbills at roost sites have been at known  
432 communal roosts of hornbills. However, as this study has indicated that an individual hornbill  
433 may not use communal roosts all the time, and they might roost singly and also use certain  
434 roost sites less frequently. At such sites, clumped dispersal of seeds is likely to be only

435 because of seeds dispersed by a hornbill over one night. Density-dependent mortality factors  
436 for the seeds and seedlings are less likely to occur at these sites, and the probability of seeds  
437 to establish would be higher as compared to the communal roosts which hornbills are known  
438 to use at least for decades if not more.

439 Datta (2001) highlighted the unsuitability of the communal roost for the establishment  
440 of rainforest tree species given the lower tree density near the riverside roosts and other  
441 microsite conditions. However, hornbills may not always roost close to the river as this study  
442 has revealed. Telemetry and roost site data on the Wreathed Hornbill also indicates potential  
443 inter-species differences in roost site selection. The Wreathed Hornbill was more likely to  
444 roost near rivers as compared to the Great Hornbills. Great Hornbill roosts were in the forest  
445 sites, often away from the river. At least some of these sites were not communal roosts (based  
446 on our long-term field observations on hornbills in the study site), indicating that not all roost  
447 sites of Great Hornbills may be unfavourable for seedling establishment.

448 Interestingly, the seed dispersal distances were almost twice as far compared to those  
449 seeds dispersed at non-roost sites during the daytime. This can be explained by the long-flight  
450 distances covered by hornbills before arriving at their roost sites. Hornbills are known to  
451 mostly carry out long-range seed dispersal (Lenz et al. 2011, Naniwadekar et al. 2019b),  
452 however, in the case of roost sites, they appear to carry out extra long-range seed dispersal as  
453 compared to the seed dispersal distances during the daytime. Given that not all roost sites  
454 might be unfavourable for seed establishment, this long-distance dispersal might be crucial  
455 for the maintenance of genetic connectivity between populations of trees and potentially  
456 enabling plants to expand their geographic ranges.

457 Our past knowledge on roosting by hornbills has come from direct observations at  
458 communal roosts, however, little was known about the patterns of roosting of individual  
459 hornbills. Despite limited sample sizes, this study has generated vital information on the

460 roosting ecology of individual hornbills. This study provides important information on the  
461 idiosyncratic roosting patterns of individuals within species and potentially across species.  
462 Given that some of the roost sites may be used for decades, the potential reasons for roost site  
463 fidelity needs to be identified. This study, along with Naniwadekar et al. (2019b), highlights  
464 the context-specificity in seed dispersal patterns and highlights that not all seed dispersal at  
465 roosting sites may be of poor quality. In instances, where the bird roosts singly or pairs at  
466 roosts that are not regularly used as well as where solitary birds use ephemeral roost sites  
467 inside the forest, the quality of seed dispersal provided will not be compromised. The extra-  
468 long seed dispersal distance at roost sites has significant implications for plant populations. In  
469 future, long-term data on roosting of multiple hornbill individuals is needed to reveal  
470 seasonal patterns in roost use.

471

## 472 **Acknowledgments**

473 This work was supported by the Department of Science and Technology (Govt. of India)  
474 under Grant No: SB/S0/AS-124/2012 and International Foundation for Science (Sweden)  
475 under Grant No: D/5136-2. We are grateful to Mr. Tana Tapi (Field Director, Pakke Tiger  
476 Reserve) and his staff for support. We are grateful to the Thailand Hornbill Project team:  
477 Pilai Poonswad, Vijak Chimchome, Phitaya Chuailua, Ittiphon Buathong, and Vichai Klinkai  
478 for training. We are grateful to Tsongjing Thonger, our field staff Khem Thapa, Tali Nabam,  
479 Turuk Brah, Kumar Thapa, Bharat Chiri, Narayan Mogar and Sital Dako, volunteers Malaysri  
480 Bhattacharya, Pranjal Mahananda, Gombu Tachang and Sathya Chandra Sagar for assistance  
481 in data collection. We thank Jahnvi Joshi, Anand Osuri, Amruta Rane, Sartaj Ghuman, and  
482 Soumya Prasad for discussions and help. We thank Goutam Narayan, Nandita Hazarika,  
483 Parag Deka and Neelam Dutta for field support. Ethical approval: All guidelines for animal  
484 care were followed. Ethics clearance was obtained from Nature Conservation Foundation.

485 We followed established methods of the Thailand Hornbill Project team for the tagging of  
486 hornbills. Female and juvenile birds were not tagged. Permission for conducting this research  
487 was granted by Ministry of Environment and Forest, (F–No. 1-61/2013 WL), National Tiger  
488 Conservation Authority (F.N. 15-5(1)/2014-NTCA) and the Arunachal Pradesh Forest  
489 Department (CWL/G/13 (95)/2011-12/Pt./1235-36).

490

491 **Declaration of interest**

492 Authors have no conflict of interests to declare

493

494 **Data sharing**

495 The data that support the findings of this study are openly available in [Movebank Data  
496 Repository] at <http://doi.org/10.5441/001/1.14sm8k1d>. The complete citation of the data is:  
497 Naniwadekar R, Rathore A, Shukla U, Chaplod S, Datta A (2019) Data from: How far do  
498 Asian forest hornbills disperse seeds? Movebank Data Repository.  
499 doi:10.5441/001/1.14sm8k1d.

500

501 **Ethical approval**

502 All applicable institutional and/or national guidelines for the care and use of animals were  
503 followed. Ethics clearance was obtained from the Ethics Committee of the Nature  
504 Conservation Foundation that gave suggestions that we complied with. We followed  
505 established methods of the Thailand Hornbill Project team and consulted senior wildlife  
506 veterinarian Dr. Parag Deka, Aranyak to minimize risk to individual birds. Giving primary  
507 importance to bird welfare, we did not tag female and juvenile birds. We obtained research  
508 and animal capture permits from the Arunachal Pradesh Forest Department, National Tiger

509 Conservation Authority and the Ministry of Environment and Forests, New Delhi and  
510 conducted the research under the supervision of the PTR forest officers.

511

#### 512 **Author contributions**

513 RN and AD conceived the idea and the study. RN, US and AR conducted the field work and  
514 collected the data. RN and AR analysed the data. RN wrote the paper. AD critically revised  
515 the manuscript. AR and US gave inputs on the manuscript. This work was part of the grants  
516 to AD and RN.

517

#### 518 **References**

- 519 BOCK, A., B. NAEF-DAENZER, H. KEIL, F. KORNER-NIEVERGELT, M. PERRIG, AND M. U.  
520 GRÜEBLER. 2013. Roost site selection by Little Owls *Athene noctua* in relation to  
521 environmental conditions and life-history stages. *Ibis* 155: 847–856.
- 522 CALENGE, C. 2006. The package “adehabitat” for the R software: A tool for the analysis of  
523 space and habitat use by animals. *Ecological Modelling* 197: 516–519.
- 524 CHAMPION, S. H. G., AND S. K. SETH. 1968. A revised survey of the forest types of India.  
525 Manager of Publications, Delhi, India.
- 526 CHANDLER, C. R., E. D. KETTERSON, AND V. NOLAN. 1995. Spatial aspects of roost-site  
527 selection in breeding male Dark-Eyed Juncos. *The Condor* 97: 279–282.
- 528 DASGUPTA, S., AND HILALUDDIN. 2012. Differential effects of hunting on populations of  
529 hornbills and imperial pigeons in the rainforests of the Eastern Indian Himalaya.  
530 *Indian Forester* 138: 902–909.

- 531 Datta, A. 2001. An ecological study of sympatric hornbills and fruiting patterns in a tropical  
532 forest in Arunachal Pradesh. Ph.D. dissertation, Saurashtra University, Gujarat, India.
- 533 EISERER, L. A. 1984. Communal roosting in birds. *Bird Behaviour* 5: 61–80.
- 534 GRASSMAN, L. I., M. E. TEWES, AND N. J. SILVY. 2005. Ranging, habitat use and activity  
535 patterns of binturong *Arctictis binturong* and yellow-throated marten *Martes flavigula*  
536 in north-central Thailand. *Wildlife Biology* 11: 49–57.
- 537 HO, H. C., AND S. SUPARI. 2000. Observations of the Plain-pouched Hornbills *Aceros*  
538 *subruficollis* in Tasek Temengor, peninsular Malaysia. *Forktail* 16: 65–67.
- 539 HOLBROOK, K. M., AND T. B. SMITH. 2000. Seed dispersal and movement patterns in two  
540 species of *Ceratogymna* hornbills in a West African tropical lowland forest.  
541 *Oecologia* 125: 249–257.
- 542 IUCN. 2019. The IUCN Red List of Threatened Species. Version 2019-1.  
543 <<http://www.iucnredlist.org>> (5 June 2020).
- 544 JAMIESON, S. E., I. CASTRO, T. JENSEN, K. W. MORRISON, AND B. DURRANT. 2016. Roosting  
545 Preferences of North Island Brown Kiwis (*Apteryx mantelli*). *The Wilson Journal of*  
546 *Ornithology* 128: 857–866.
- 547 JANKOWIAK, L., P. SKÓRKA, L. LAWICKI, P. WYLEGAŁA, M. POLAKOWSKI, A. WUCZYŃSKI,  
548 AND P. TRYJANOWSKI. 2015. Patterns of occurrence and abundance of roosting geese:  
549 the role of spatial scale for site selection and consequences for conservation.  
550 *Ecological Research* 30: 833–842.

- 551 JIRINEC, V., E. C. ELIZONDO, C. L. RUTT, AND P. C. STOUFFER. 2018. Space use, diurnal  
552 movement, and roosting of a Variegated Ant-pitta (*Grallaria varia*) in central  
553 Amazonia. *Ornitologia Neotropical* 29: 13–20.
- 554 JIRINEC, V., C. P. VARIAN, C. J. SMITH, AND M. LEU. 2016. Mismatch between diurnal home  
555 ranges and roosting areas in the Wood Thrush (*Hylocichla mustelina*): Possible role of  
556 habitat and breeding stage. *The Auk* 133: 1–12.
- 557 JOHNSTON-GONZÁLEZ, R., AND E. ABRIL. 2019. Predation risk and resource availability  
558 explain roost locations of Whimbrel *Numenius phaeopus* in a tropical mangrove delta.  
559 *Ibis* 161: 839–853.
- 560 KAUR, R., T. ONG, K. C. LIM, AND C. A. YEAP. 2011. A survey on mass movements of the  
561 vulnerable plain-pouched hornbill in the Belum-Temengor forest complex, peninsular  
562 Malaysia. *The Raffles Bulletin of Zoology* 24: 171–176.
- 563 KEMP, A. 1995. *The Hornbills*. Oxford University Press, Oxford, UK.
- 564 KINNAIRD, M. F. 1998. Evidence for effective seed dispersal by the Sulawesi Red-Knobbed  
565 Hornbill, *Aceros cassidix*. *Biotropica* 30: 50–55.
- 566 KITAMURA, S. 2011. Frugivory and seed dispersal by hornbills (Bucerotidae) in tropical  
567 forests. *Acta Oecologica* 37: 531–541.
- 568 KITAMURA, S., T. YUMOTO, N. NOMA, P. CHUAILUA, T. MARUHASHI, P. WOHANDEE, AND P.  
569 POONSWAD. 2008. Aggregated seed dispersal by wreathed hornbills at a roost site in a  
570 moist evergreen forest of Thailand. *Ecological Research* 23: 943–952.



- 571 LENZ, J., W. FIEDLER, T. CAPRANO, W. FRIEDRICH, B. H. GAESE, M. WIKELSKI, AND K.  
572 BÖHNING-GAESE. 2011. Seed-dispersal distributions by trumpeter hornbills in  
573 fragmented landscapes. *Proceedings of the Royal Society B* 278: 2257–2264.
- 574 NANIWADEKAR, R. 2014. Seed dispersal by hornbills, conservation status and the  
575 consequences of their decline in tropical forests of Arunachal Pradesh. [Online.]  
576 Available at <http://shodhganga.inflibnet.ac.in/handle/10603/32462>. Ph.D. dissertation,  
577 Manipal University, Karnataka, India
- 578 NANIWADEKAR, R., S. CHAPLOD, A. DATTA, A. RATHORE, AND H. SRIDHAR. 2019a. Large  
579 frugivores matter: insights from network and seed dispersal effectiveness approaches.  
580 *Journal of Animal Ecology* 88: 1250–1262.
- 581 NANIWADEKAR, R., C. MISHRA, K. ISVARAN, M. D. MADHUSUDAN, AND A. DATTA. 2015.  
582 Looking beyond parks: the conservation value of unprotected areas for hornbills in  
583 Arunachal Pradesh, Eastern Himalaya. *Oryx* 49: 303–311.
- 584 NANIWADEKAR, R., A. RATHORE, U. SHUKLA, S. CHAPLOD, AND A. DATTA. 2019b. How far  
585 do Asian forest hornbills disperse seeds? *Acta Oecologica* 101: 103482.
- 586 NANIWADEKAR, R., A. RATHORE, U. SHUKLA, AND A. DATTA. 2019c. Data from: How far do  
587 Asian forest hornbills disperse seeds? Movebank Data Repository. [https://doi.](https://doi.org/10.5441/001/1.14sm8k1d)  
588 [org/10.5441/001/1.14sm8k1d](https://doi.org/10.5441/001/1.14sm8k1d).
- 589 PETERS, K. A., AND D. L. OTIS. 2007. Shorebird roost-site selection at two temporal scales: is  
590 human disturbance a factor? *Journal of Applied Ecology* 44: 196–209.
- 591 POONSWAD, P., A. KEMP, AND M. STRANGE. 2013. *Hornbills of the World: A Photographic*  
592 *Guide*. Draco Publishing.

- 593 R CORE TEAM. 2019. R: A Language and Environment for Statistical Computing. R  
594 Foundation for Statistical Computing, Vienna, Austria.
- 595 ROHNER, C., C. J. KREBS, D. B. HUNTER, AND D. C. CURRIE. 2000. Roost site selection of  
596 Great Horned Owls in relation to black fly activity: an anti-parasite behavior? The  
597 Condor 102: 950–955.
- 598 RUSSO, S. E., AND C. K. AUGSPURGER. 2004. Aggregated seed dispersal by spider monkeys  
599 limits recruitment to clumped patterns in *Virola calophylla*. Ecology Letters 7: 1058–  
600 1067.
- 601 SHUKLA, U., R. NANIWADEKAR, A. RATHORE, AND A. DATTA. IN PRESS. Variability in gut  
602 passage times of Asian hornbills for large-seeded tree species. Sarawak Museum  
603 Journal in press.
- 604 TAN, C. K. W., D. G. ROCHA, G. R. CLEMENTS, E. BRENES-MORA, L. HEDGES, K. KAWANISHI,  
605 S. W. MOHAMAD, D. MARK RAYAN, G. BOLONGON, J. MOORE, J. WADEY, ET AL. 2017.  
606 Habitat use and predicted range for the mainland clouded leopard *Neofelis nebulosa* in  
607 Peninsular Malaysia. Biological Conservation 206: 65–74.
- 608 THAILAND HORNBILL PROJECT. 2019. Progress report of the study of core areas use by  
609 hornbills in forest complexes and the community-based conservation of hornbills in  
610 Thailand from May 2017 to Jun 2019. Report produced by Thailand Hornbill Project,  
611 in collaboration with Kasetsart University, Mahidol University and Department of  
612 National Parks, Wildlife and Plant Conservation.
- 613 TOWNSEND, J. M., C. C. RIMMER, J. BROCCA, K. P. MCFARLAND, AND A. K. TOWNSEND. 2009.  
614 Predation of a wintering migratory songbird by introduced rats: can nocturnal roosting  
615 behavior serve as predator avoidance? The Condor 111: 565–569.

- 616 WARD, P., AND A. ZAHAVI. 1973. The importance of certain assemblages of birds as  
617 “information-centres” for food-finding. *Ibis* 115: 517–534.
- 618 WATTS, B. D., AND C. TURRIN. 2017. Mapping bald eagle activity shadows around communal  
619 roosts. *The Journal of Wildlife Management* 81: 928–937.
- 620 WILLIAMS, J. B., AND M. DU PLESSIS. 2013. Field metabolism and water influx of communal  
621 roosting Green Woodhoopoes *Phoeniculus purpureus*. *Ardea* 101: 60–64.
- 622 WORTON, B. J. 1989. Kernel methods for estimating the utilization distribution in home-range  
623 studies. *Ecology* 70: 164–168.
- 624 WORTON, B. J. 1995. Using Monte Carlo simulation to evaluate kernel-based home range  
625 estimators. *The Journal of Wildlife Management* 59: 794–800.
- 626 ZABALA, J., I. ZUBEROGOITIA, G. BELAMENDIA, AND J. ARIZAGA. 2012. Micro-habitat use by  
627 Bramblings *Fringilla montifringilla* within a winter roosting site: influence of  
628 microclimate and human disturbance. *Acta Ornithologica* 47: 176–181.
- 629 ZOGHBY, B. A., R. M. LITTLE, P. G. RYAN, AND P. A. HOCKEY. 2016. Patterns of roost site  
630 selection and use by Southern Ground-Hornbills in north-eastern South Africa.  
631 *Ostrich* 87: 125–130.
- 632

633 **Table 1.** Breeding status, number of days of roosting data available for the five tagged  
634 hornbills (one Wreathed and four Great Hornbills), number of unique roost sites (separated  
635 by 200 m distance), and mean (range) number of nights a roost site was used by the different  
636 individual hornbills.

| <b>Hornbill ID</b> | <b>Species</b>    | <b>Status</b> | <b># days data available</b> | <b># of unique roost sites</b> | <b>Mean (range) number of nights a roost site was used</b> |
|--------------------|-------------------|---------------|------------------------------|--------------------------------|------------------------------------------------------------|
| GH2NBr             | Great Hornbill    | Non-breeding  | 30                           | 11                             | 2.7 (1-8)                                                  |
| GH3Br              | Great Hornbill    | Breeding      | 38                           | 8                              | 4.8 (1-17)                                                 |
| GH4Br              | Great Hornbill    | Breeding      | 19                           | 3                              | 6.3 (1-17)                                                 |
| GH5NBr             | Great Hornbill    | Non-breeding  | 55                           | 33                             | 1.7 (1-11)                                                 |
| WH1Br              | Wreathed Hornbill | Breeding      | 72                           | 10                             | 7.2 (1-18)                                                 |
| Total              |                   |               | 214                          |                                |                                                            |

637

638

639 **Table 2.** The average ( $\pm$  SD and range) distance (in metres) between roost sites on  
 640 consecutive days for the different hornbill individuals and the mean (range) number of  
 641 consecutive days when the birds used the same roost, and the number of days for which roost  
 642 data from consecutive days was available is also given. \* – Number of days for which the  
 643 roost data was available for successive nights. This number is different from the number of  
 644 days for which the roost data is available (which is summarized in Table 1) since no roost  
 645 data was available for some nights during the tracking period.

| <b>Individual</b> | <b>Mean (<math>\pm</math> SD)<br/>distance<br/>between roost<br/>sites on<br/>successive<br/>nights (m)</b> | <b>Range<br/>(minimum –<br/>maximum)<br/>distance<br/>between<br/>roost sites on<br/>successive<br/>nights (m)</b> | <b>Mean (range) number<br/>of successive nights<br/>when the bird used<br/>the same roost</b> | <b>Number<br/>of days<br/>for which<br/>data was<br/>available*</b> |
|-------------------|-------------------------------------------------------------------------------------------------------------|--------------------------------------------------------------------------------------------------------------------|-----------------------------------------------------------------------------------------------|---------------------------------------------------------------------|
| GH2NBr            | 232.6 (302.0)                                                                                               | 12.6 – 1183.1                                                                                                      | 4.7 (3 – 7)                                                                                   | 16                                                                  |
| GH3Br             | 327.9 (234.7)                                                                                               | 17.8 – 709.3                                                                                                       | 3.5 (2 – 5)                                                                                   | 30                                                                  |
| GH4Br             | 130.3 (199.1)                                                                                               | 3.3 – 601.8                                                                                                        | 5.3 (5 – 6)                                                                                   | 18                                                                  |
| GH5NBr            | 1050.6 (1034.6)                                                                                             | 5.0 – 4318.7                                                                                                       | 2.6 (2 – 5)                                                                                   | 47                                                                  |
| WH1Br             | 1305.2 (1575.0)                                                                                             | 3.1 – 4698.7                                                                                                       | 3.8 (2 – 6)                                                                                   | 70                                                                  |

646

647 **Figure Captions**

648 **Figure 1.** Box and whisker plot depicts that the roosts of the Wreathed Hornbill were close to  
649 the river (A) while the roosts of Great Hornbills were not necessarily near the river. The  
650 median distances of roosts from the nest sites were above 500 m for the three breeding  
651 hornbills. Black-filled points depict individual data points.

652 **Figure 2.** All the roost locations of hornbills (except one roost location for GH4Br) are  
653 within the 95% (area enclosed within the black line) kernel density diurnal activity range for  
654 the five hornbills but not necessarily within the 50% kernel density activity range (area  
655 shown in grey). The locations used for the kernel density diurnal activity range estimation are  
656 those between 05:00–17:00 hr for the five hornbills, thereby excluding the roost locations.  
657 The black dots are the roost locations of the bird identified using hierarchical cluster analysis.  
658 One roost location for GH4Br which was outside the 95% kernel density diurnal activity  
659 range is not shown since it was used for only one night and it was far away from its activity  
660 range. Coordinates on the map represent the north and east latitudes and longitudes  
661 respectively.

662 **Figure 3.** Mean displacement in a 15-min time interval for the five hornbill individuals.  
663 GH3Br and GH4Br are breeding Great Hornbills, GH2NBr and GH5NBr are non-breeding  
664 Great Hornbills with the former tagged in the winter season (which is the non-breeding  
665 season) and the latter in the early summer (which coincides with the breeding season).  
666 WH1Br is the breeding Wreathed Hornbill. There is a spike in the displacement just after and  
667 before the bird leaves the roost. It indicated that birds travel a long distance after they leave  
668 the roost in the morning and before returning to the roost in the evening.

669 **Figure 4.** The number of Great and Wreathed Hornbills seen at the two roosts outside Pakke  
670 Tiger Reserve in the breeding (March – July) and non-breeding (August – February) season

671 based on data collected by monitoring in 2015 and 2016 based on 161 days of monitoring in

672 Darlong village and 95 days of monitoring at the River Bank site.

673 **Figure 5.** (A) Estimated relative percentages of seeds that hornbill dispersed at the roost and

674 non-roost (other) sites. Most of the seeds are dispersed at non-roost sites. (B) Estimated mean

675 ( $\pm$  95% CI) seed dispersal distances when the seed was dispersed at the roost and non-roost

676 (other) sites.

677 **Figure 1**

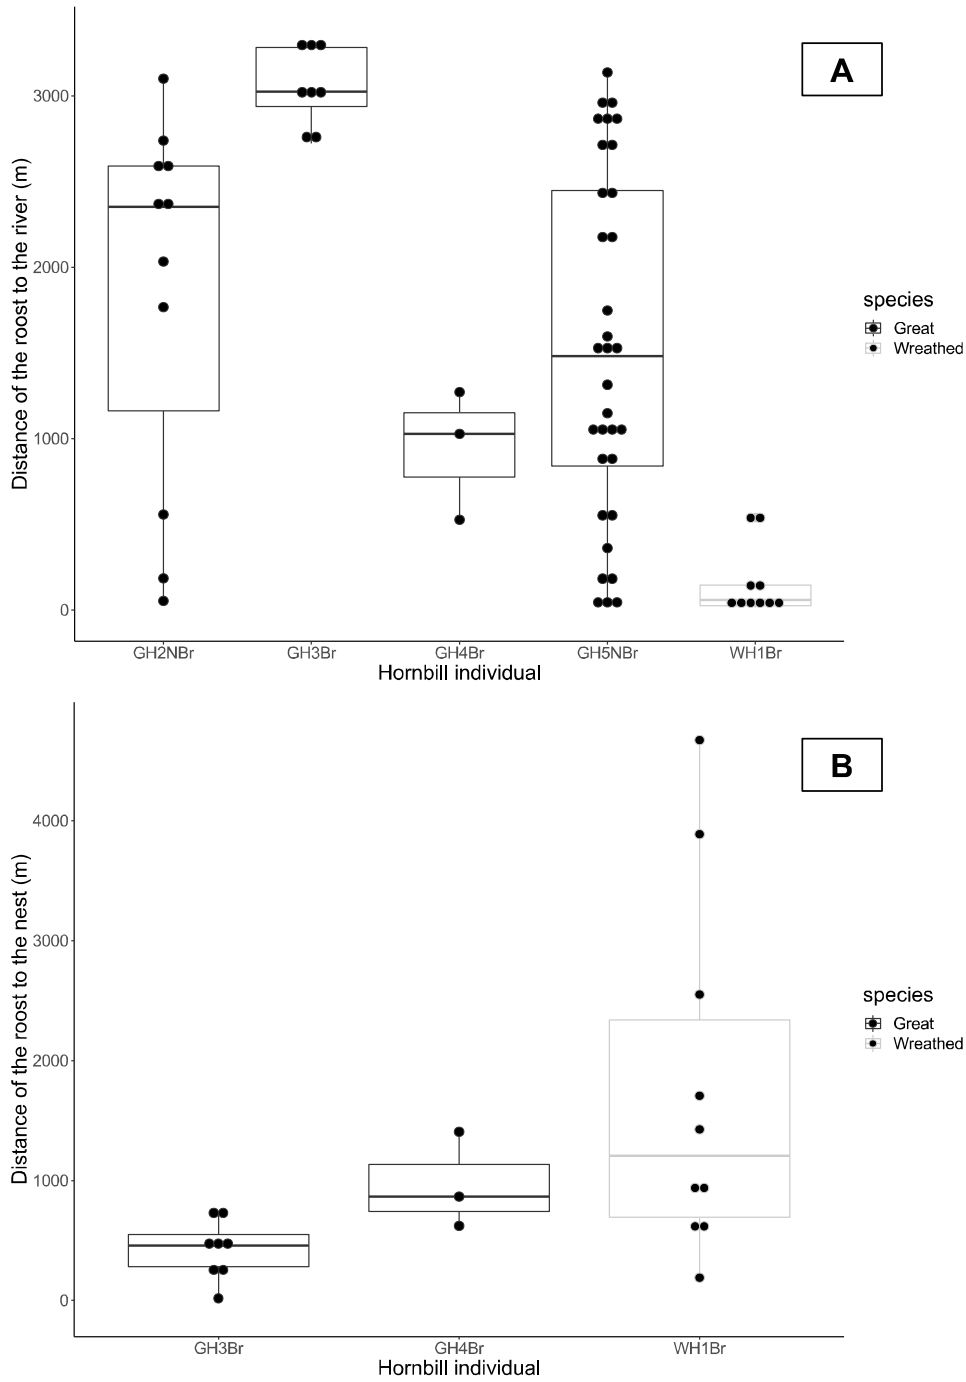

678



679 **Figure 2**

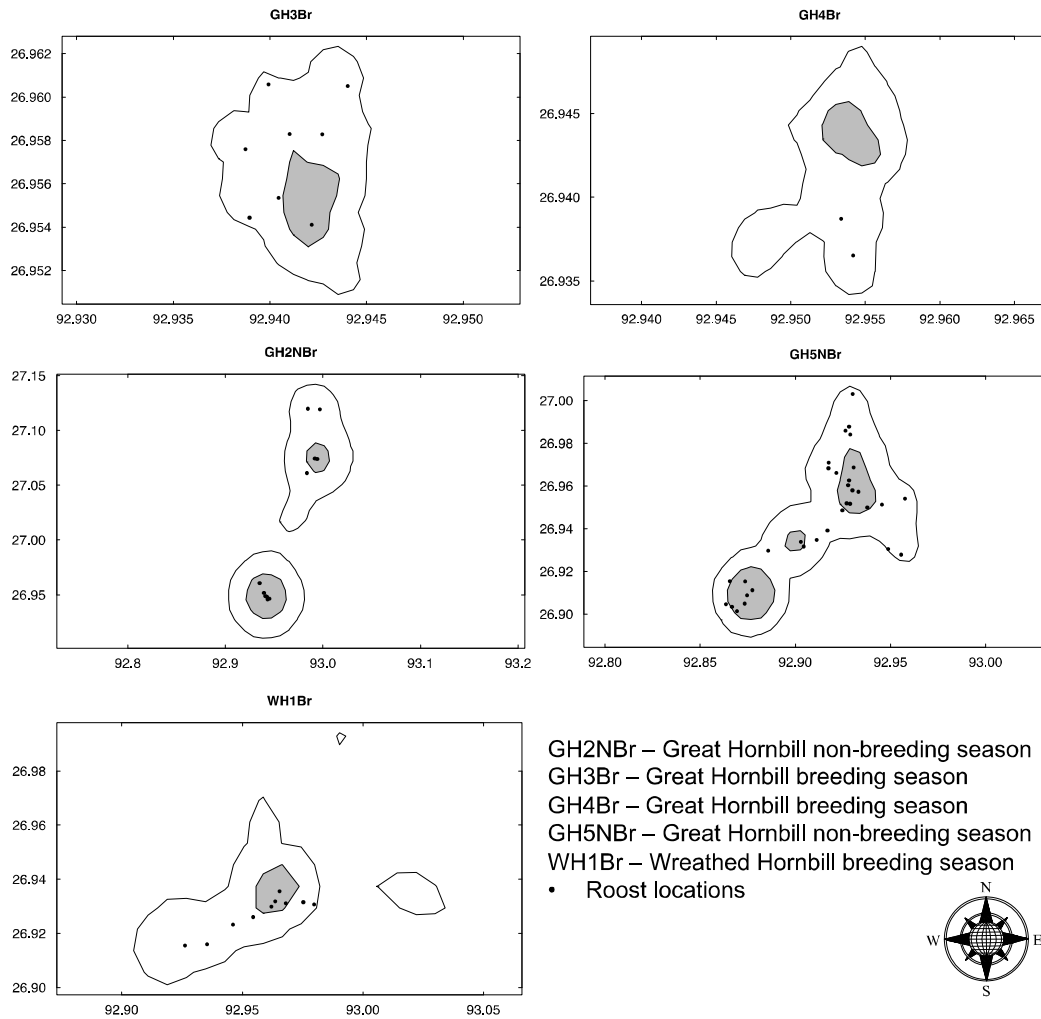

680

681

682 **Figure 3**

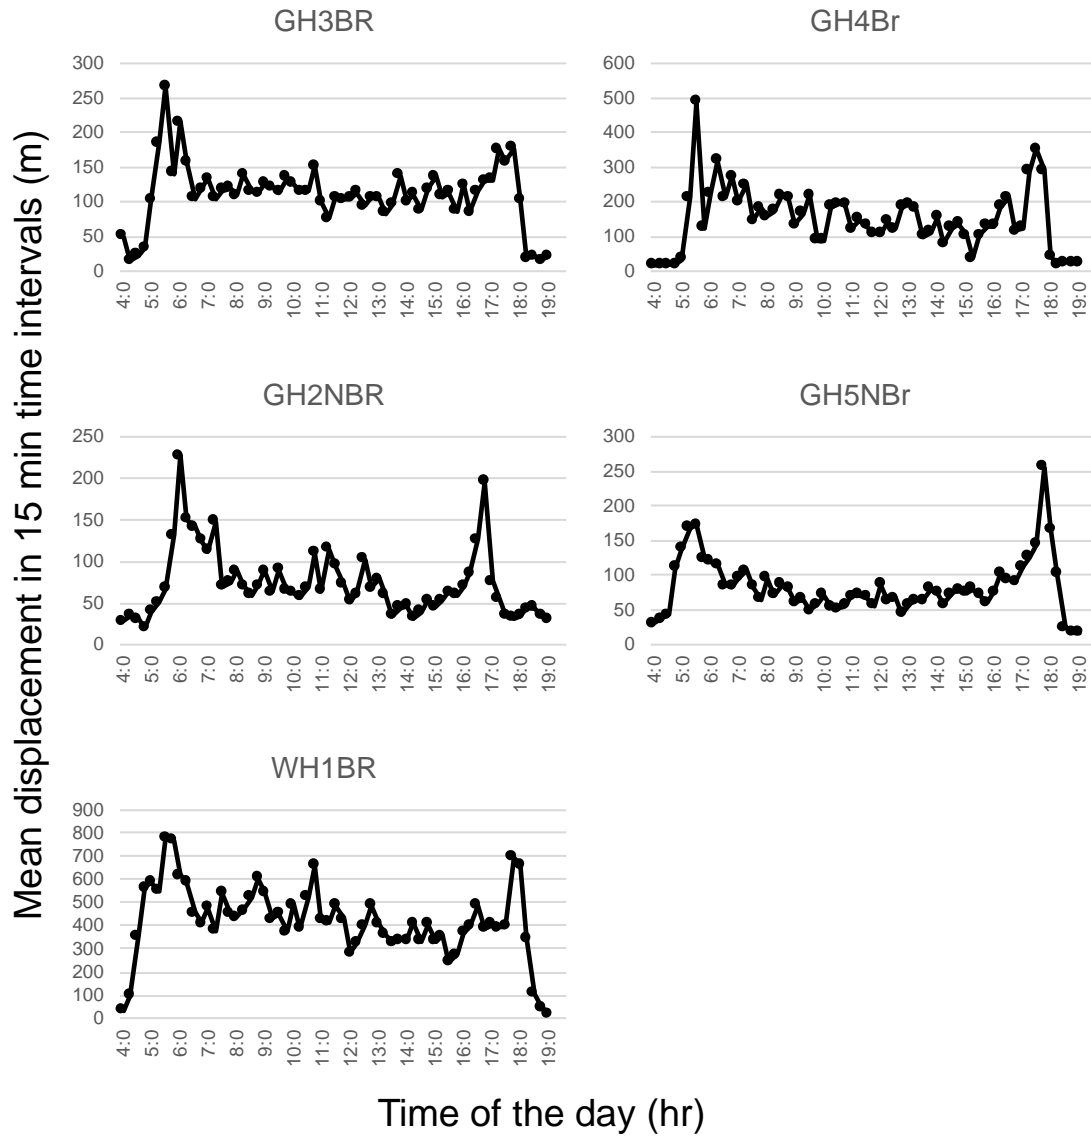

683

684

685 **Figure 4**

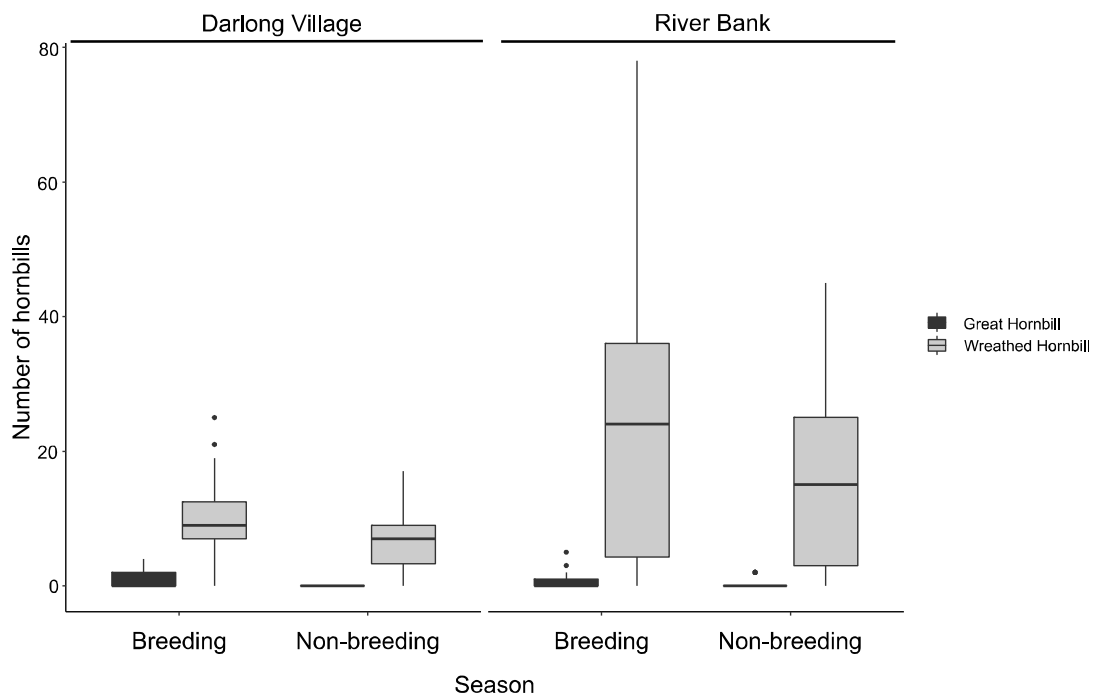

686

687 **Figure 5**

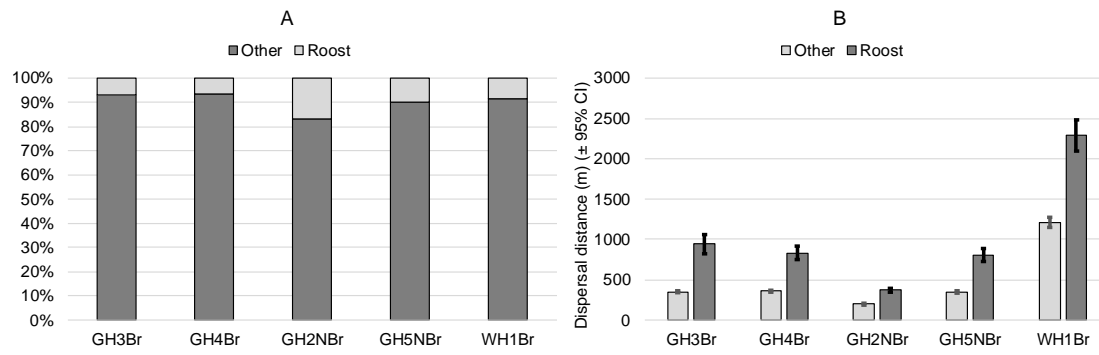

688
